# Supplementary material for: Transcriptome analysis of rice root heterosis by RNA-Seq
Source: PubMed Central journal article supplement (PMC3556317; doi:10.1186/1471-2164-14-19), 2013-01-16
Supplement: 1471-2164-14-19-S1.pdf [file 1471-2164-14-19-S1.pdf]

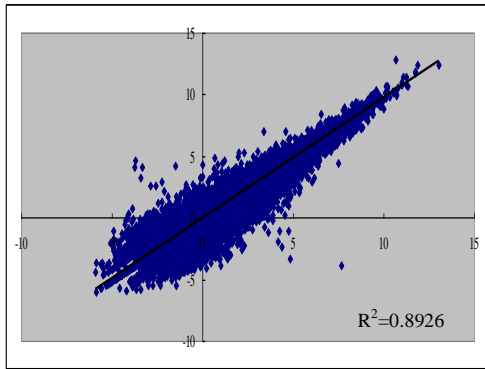

**R12**

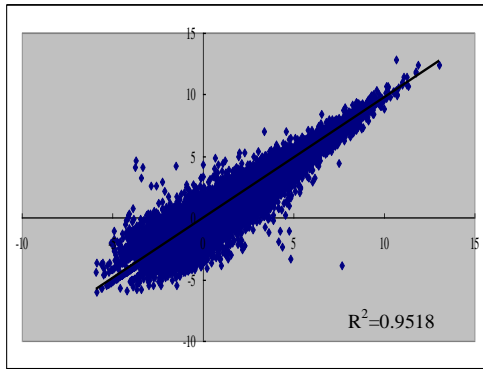

**R34**

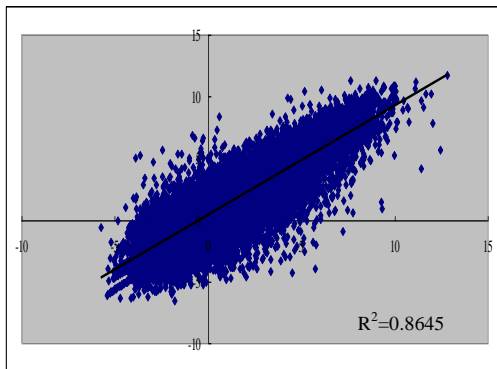

**F12**

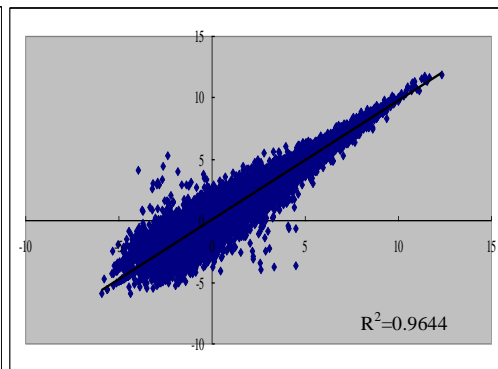

**F34**

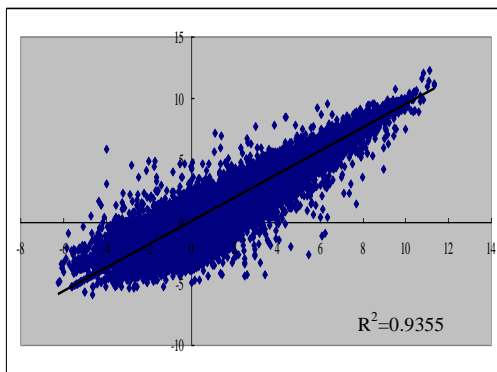

**X12**

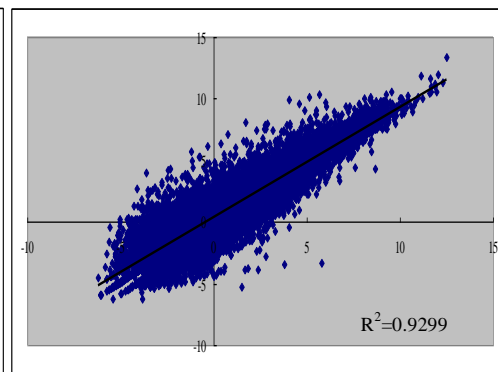

**X34**
