# Supplementary material for: Transcriptome analysis of rice root heterosis by RNA-Seq
Source: PubMed Central journal article supplement (PMC3556317; doi:10.1186/1471-2164-14-19), 2013-01-16

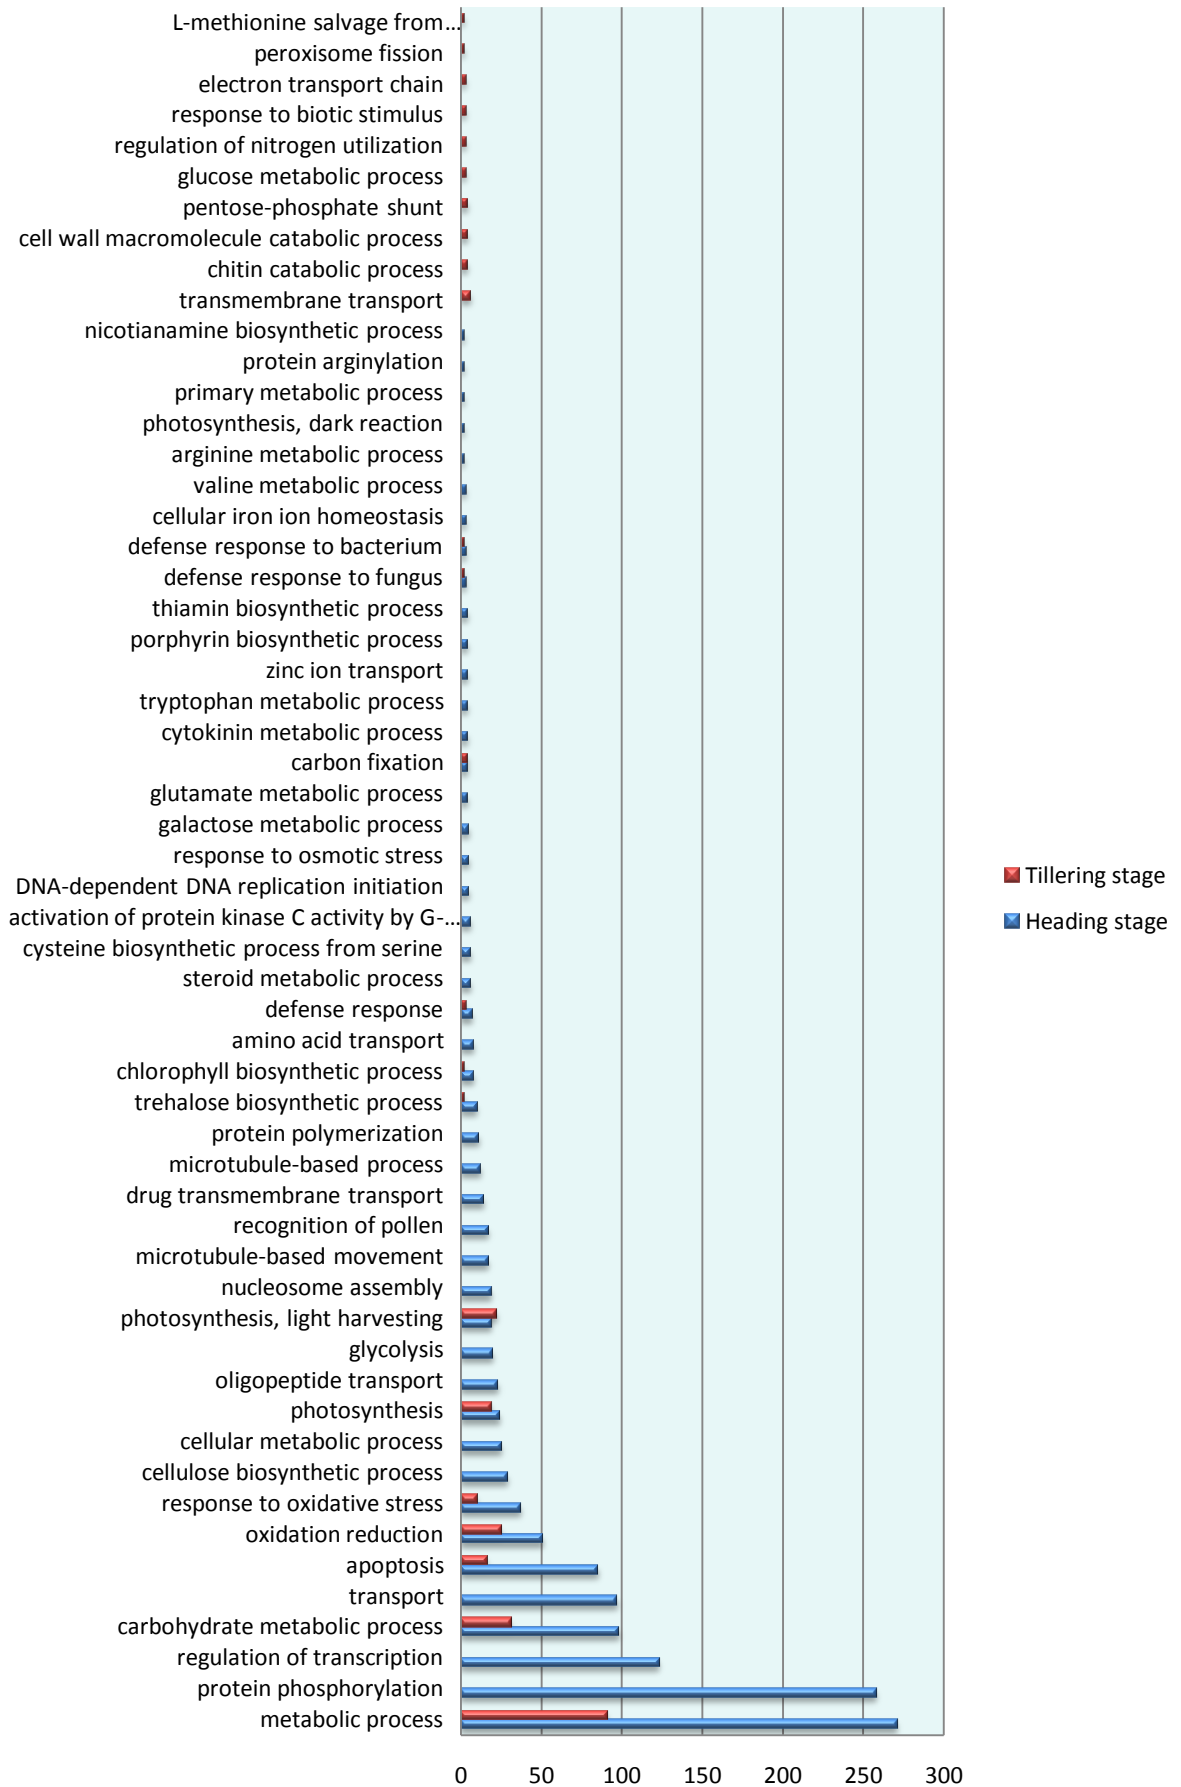

Supplement: 1471-2164-14-19-S5.pdf [file 1471-2164-14-19-S5.pdf]
